# Supplementary material for: Secondary Sympatry Caused by Range Expansion Informs on the Dynamics of Microendemism in a Biodiversity Hotspot
Source: PubMed Central journal article supplement (PMC3490955; doi:10.1371/journal.pone.0048047), 2012-11-06

Figure S1

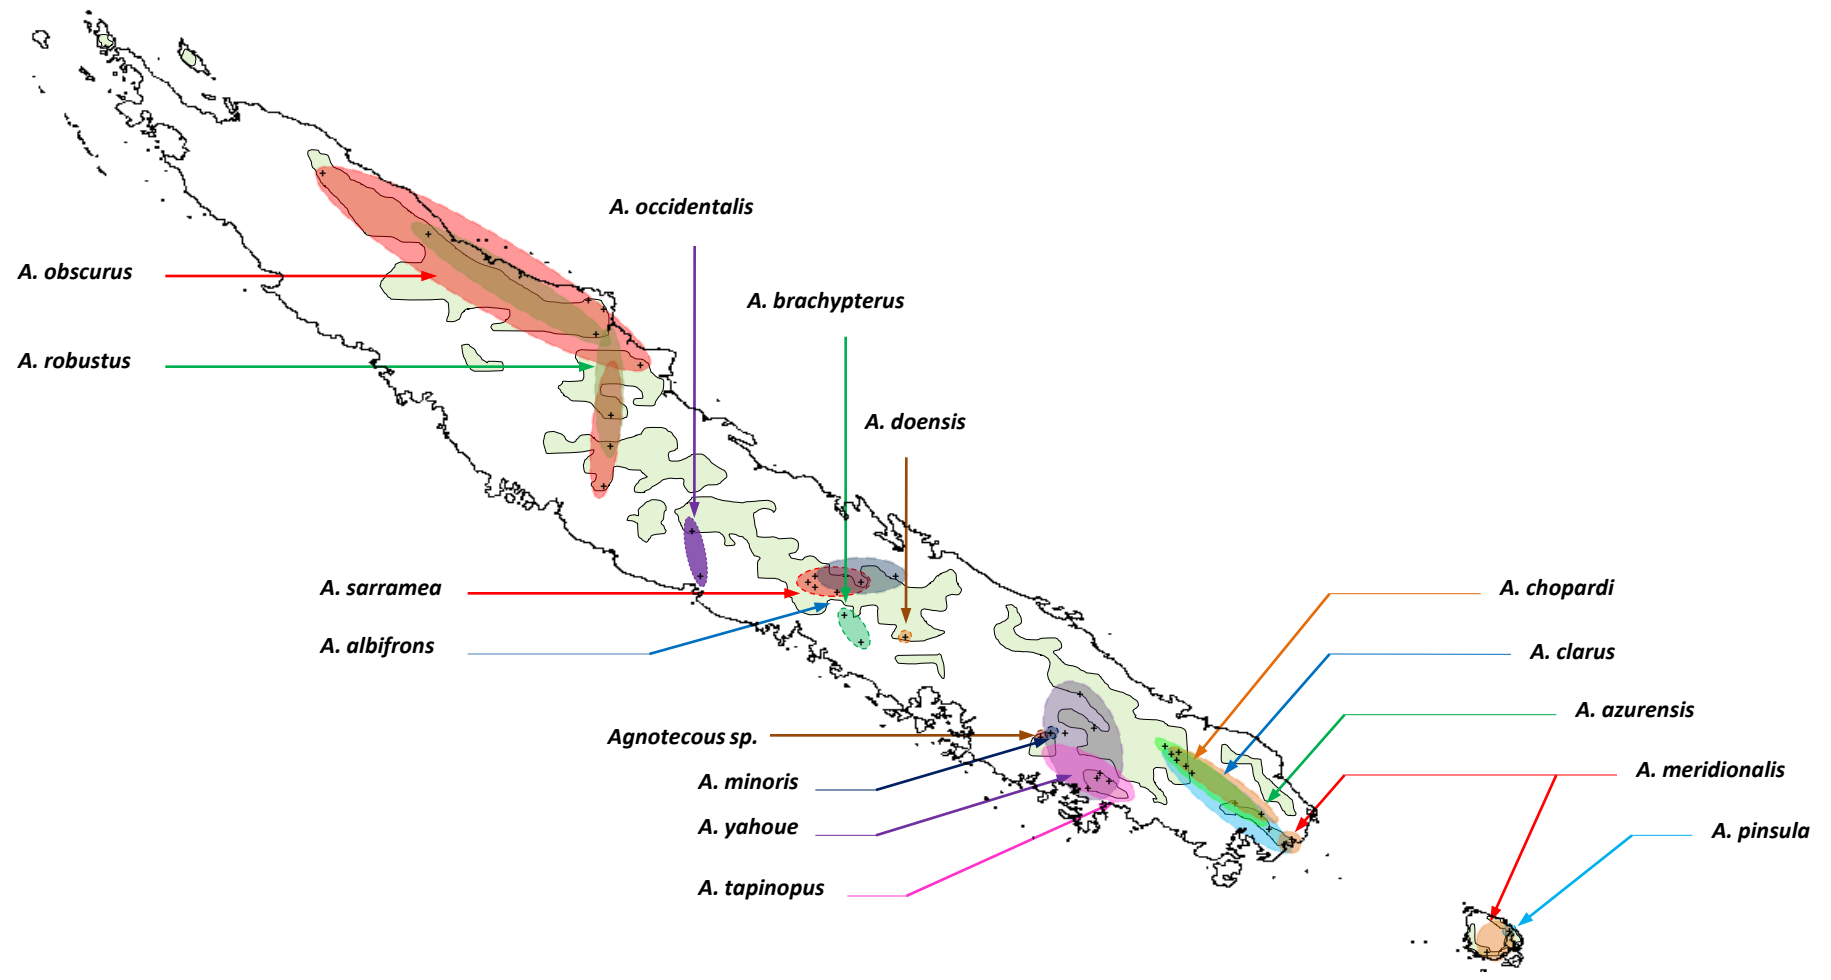

Supplement: pone.0048047.s001.pdf [file pone.0048047.s001.pdf]
