# Supplementary material for: Secondary Sympatry Caused by Range Expansion Informs on the Dynamics of Microendemism in a Biodiversity Hotspot
Source: PubMed Central journal article supplement (PMC3490955; doi:10.1371/journal.pone.0048047), 2012-11-06
Supplement: pone.0048047.s005.pdf [file pone.0048047.s005.pdf]

**TABLE S1**

| Species                                                             | Locality                       | Voucher specimens<br>MNHN collection number | GenBank accession number |          |          |          |          |          |          |          |          |          |
|---------------------------------------------------------------------|--------------------------------|---------------------------------------------|--------------------------|----------|----------|----------|----------|----------|----------|----------|----------|----------|
|                                                                     |                                |                                             | MITOCHONDRIAL            |          |          |          |          | NUCLEAR  |          |          |          |          |
|                                                                     |                                |                                             | 16S                      | 12S      | Cytb     | CO1      | CO2      | 28S      | EF1a     | Hexk     | H3       | 18S      |
| <i>Agnotecous yahoue</i> Otte, 1987                                 | <i>Mont Mou (basis)</i>        | <i>MNHN-ENSIF-2773</i>                      | JX897367                 | JX897388 | JX897337 | JX897437 | JX897462 | JX897479 | JX897501 | -        | -        | -        |
|                                                                     | <i>Monts Koghis</i>            | <i>MNHN-ENSIF-2766</i>                      | JX897366                 | JX897387 | JX897334 | JX897438 | JX897463 | JX897478 | JX897500 | JX897542 | JX897549 | JX897602 |
| <i>Agnotecous</i> sp.                                               | <i>Mont Mou (summit)</i>       | <i>MNHN-ENSIF-2774</i>                      | JX897364                 | JX897385 | JX897336 | JX897435 | JX897464 | JX897482 | JX897518 | -        | JX897563 | JX897603 |
|                                                                     | <i>Mont Mou (maquis)</i>       | <i>MNHN-ENSIF-2751</i>                      | JX897365                 | -        | JX897312 | JX897436 | -        | JX897481 | JX897517 | -        | -        | -        |
| <i>Agnotecous azurensis</i> Desutter-Grandcolas, 2006               | <i>Pic du Pin</i>              | <i>MNHN-ENSIF-2778</i>                      | JX897361                 | JX897390 | JX897332 | JX897427 | JX897455 | JX897473 | JX897506 | -        | JX897568 | JX897594 |
|                                                                     | <i>Rivière Bleue (Pourina)</i> | <i>MNHN-ENSIF-2780</i>                      | JX897358                 | JX897376 | JX897329 | JX897423 | JX897453 | JX897475 | JX897502 | -        | JX897566 | JX897595 |
|                                                                     | <i>Rivière bleue</i>           | <i>MNHN-ENSIF-2789</i>                      | JX897374                 | JX897377 | JX897330 | JX897425 | -        | JX897476 | JX897504 | JX897539 | JX897567 | JX897600 |
|                                                                     | <i>Rivière Blanche</i>         | <i>MNHN-ENSIF-2779</i>                      | JX897346                 | -        | JX897328 | JX897424 | -        | JX897474 | JX897503 | JX897532 | JX897569 | -        |
|                                                                     | <i>Grand Kaori</i>             | <i>MNHN-ENSIF-2777</i>                      | JX897360                 | JX897389 | JX897331 | JX897426 | -        | JX897472 | JX897505 | -        | JX897565 | JX897593 |
| <i>Agnotecous brachypterus pocquensis</i> Desutter-Grandcolas, 2010 | <i>Pocquereux</i>              | <i>MNHN-ENSIF-2664</i>                      | JX897370                 | JX897382 | JX897341 | JX897432 | JX897459 | JX897485 | JX897516 | JX897530 | JX897571 | JX897596 |
| <i>Agnotecous sarramea</i> Desutter-Grandcolas, 1997                | <i>Mé Aréto</i>                | <i>MNHN-ENSIF-2764</i>                      | JX897372                 | JX897380 | JX897342 | JX897430 | JX897456 | JX897471 | JX897511 | JX897538 | JX897561 | JX897598 |
|                                                                     | <i>Table Unio</i>              | <i>MNHN-ENSIF-2787</i>                      | JX897371                 | JX897384 | JX897339 | JX897433 | JX897458 | JX897477 | JX897514 | -        | JX897560 | JX897604 |
| <i>Agnotecous pinsula</i> Robillard, 2010                           | <i>Ile des Pins</i>            | <i>MNHN-ENSIF-2624</i>                      | JX897369                 | JX897383 | JX897338 | JX897429 | JX897457 | JX897484 | JX897509 | -        | JX897562 | JX897599 |
| <i>Agnotecous chopardi</i> Desutter-Grandcolas, 2006                | <i>Haute Rivière bleue</i>     | <i>MNHN-ENSIF-2781</i>                      | JX897363                 | JX897391 | JX897335 | JX897411 | JX897440 | JX897469 | JX897499 | JX897537 | JX897559 | JX897601 |
| <i>Agnotecous doensis</i> Desutter-Grandcolas, 2006                 | <i>Mont Do</i>                 | <i>MNHN-ENSIF-2782</i>                      | JX897368                 | JX897381 | JX897340 | JX897431 | JX897460 | JX897480 | JX897513 | JX897536 | JX897558 | JX897592 |
| <i>Agnotecous tapinopus</i> Saussure, 1878                          | <i>Mont Mou</i>                | <i>MNHN-ENSIF-2769</i>                      | JX897345                 | JX897379 | JX897326 | JX897421 | JX897452 | JX897468 | JX897508 | JX897541 | JX897557 | JX897580 |
|                                                                     | <i>Monts Koghis</i>            | <i>MNHN-ENSIF-2770</i>                      | JX897344                 | JX897378 | JX897327 | JX897422 | JX897454 | JX897470 | JX897507 | JX897540 | JX897556 | JX897605 |
| <i>Agnotecous albifrons</i> Desutter-Grandcolas, 1997               | <i>Gelima</i>                  | <i>MNHN-ENSIF-1771</i>                      | JX897354                 | JX897396 | JX897316 | JX897416 | JX897445 | -        | JX897529 | -        | JX897574 | JX897585 |
|                                                                     | <i>Farino</i>                  | <i>MNHN-ENSIF-1766</i>                      | JX897351                 | JX897395 | JX897315 | JX897417 | JX897444 | -        | JX897526 | -        | JX897575 | JX897584 |
|                                                                     | <i>Table Unio</i>              | <i>MNHN-ENSIF-1770</i>                      | JX897352                 | JX897397 | JX897317 | JX897419 | JX897447 | -        | JX897528 | -        | JX897573 | JX897581 |
|                                                                     | <i>Col Toma</i>                | <i>MNHN-ENSIF-2767</i>                      | JX897353                 | JX897394 | JX897314 | JX897418 | JX897446 | JX897490 | JX897527 | -        | JX897572 | JX897583 |
| <i>Agnotecous obscurus</i> (Chopard, 1970)                          | <i>Aoupinié</i>                | <i>MNHN-ENSIF-2786</i>                      | JX897356                 | JX897398 | JX897319 | JX897415 | JX897449 | -        | JX897510 | -        | -        | JX897591 |
|                                                                     | <i>Mandjelia</i>               | <i>MNHN-ENSIF-2785</i>                      | JX897357                 | JX897393 | JX897320 | JX897412 | JX897450 | JX897487 | JX897525 | JX897531 | JX897576 | JX897587 |
|                                                                     | <i>Touho</i>                   | <i>MNHN-ENSIF-2784</i>                      | JX897355                 | JX897399 | JX897321 | JX897413 | -        | -        | JX897524 | -        | JX897578 | JX897582 |
|                                                                     | <i>Amoa</i>                    | <i>MNHN-ENSIF-2783</i>                      | -                        | JX897392 | JX897318 | JX897414 | JX897448 | -        | JX897497 | -        | JX897577 | JX897586 |
| <i>Agnotecous meridionalis</i> Desutter-Grandcolas, 2006            | <i>Port Boisé</i>              | <i>MNHN-ENSIF-2771</i>                      | JX897350                 | JX897402 | JX897313 | JX897410 | JX897442 | JX897489 | JX897520 | -        | JX897550 | JX897597 |
|                                                                     | <i>Ile des Pins</i>            | <i>MNHN-ENSIF-2772</i>                      | JX897349                 | JX897401 | JX897311 | JX897420 | -        | JX897488 | JX897519 | JX897545 | JX897553 | JX897579 |

|                                                          |                           |                        |          |          |          |          |          |          |          |          |          |           |
|----------------------------------------------------------|---------------------------|------------------------|----------|----------|----------|----------|----------|----------|----------|----------|----------|-----------|
| <i>Agnotecous robustus</i> (Chopard, 1915)               | <i>Aoupinié</i>           | <i>MNHN-ENSIF-2752</i> | JX897359 | JX897375 | JX897333 | JX897406 | JX897443 | -        | JX897498 | JX897535 | JX897555 | JX897588  |
| <i>Agnotecous clarus</i> Desutter-Grandcolas, 2006       | <i>Rivière Blanche</i>    | <i>MNHN-ENSIF-2763</i> | JX897348 | -        | JX897325 | JX897408 | -        | JX897486 | JX897521 | -        | JX897552 | -         |
|                                                          | <i>Grand Kaori</i>        | <i>MNHN-ENSIF-2776</i> | JX897343 | -        | JX897323 | JX897409 | -        | JX897491 | JX897522 | JX897543 | JX897551 | -         |
|                                                          | <i>Pic du Pin</i>         | <i>MNHN-ENSIF-2788</i> | JX897347 | JX897400 | JX897324 | JX897407 | JX897451 | JX897492 | JX897523 | JX897544 | JX897554 | JX897590  |
| <i>Agnotecous occidentalis</i> Desutter-Grandcolas, 2006 | <i>Col des Roussettes</i> | <i>MNHN-ENSIF-2765</i> | JX897362 | JX897386 | JX897322 | JX897434 | JX897461 | -        | JX897512 | JX897533 | JX897570 | JX897589  |
| <i>Agnotecous minoris</i> Robillard, 2010                | Mont Mou (basis)          | <i>MNHN-ENSIF-1389</i> | JX897373 | -        | -        | JX897428 | -        | JX897483 | JX897515 | JX897534 | JX897564 | -         |
| <i>Lebinthus santoensis</i> Robillard, 2009              | Vanuatu, Espiritu Santo   | <i>MNHN-ENSIF-2437</i> | JF972527 | JF972511 | JF972495 | JX897405 | JX897441 | JX897467 | JX897496 | -        | JX897548 | JF972542  |
| <i>Nisitrus vittatus</i> (Haan, 1842)                    | Singapore                 | <i>MNHN-ENSIF-2742</i> | AY905314 | AY905284 | AY905369 | -        | -        | -        | JX897493 | -        | JX897546 | AY905340  |
| <i>Eneoptera guyanensis</i> Chopard, 1920                | French Guiana             | <i>MNHN-ENSIF-2741</i> | AY905301 | AY905272 | AY905355 | JX897404 | -        | JX897466 | JX897495 | -        | JX897547 | AY905331  |
| <i>Acheta domesticus</i> (Linnaeus, 1758)                | Worldwide distribution    | -                      | AF248698 | AD297611 | AF248682 | JX897403 | JX897439 | JX897465 | JX897494 | -        | -        | AD18SITS1 |
