# Supplementary material for: Secondary Sympatry Caused by Range Expansion Informs on the Dynamics of Microendemism in a Biodiversity Hotspot
Source: PubMed Central journal article supplement (PMC3490955; doi:10.1371/journal.pone.0048047), 2012-11-06
Supplement: pone.0048047.s006.pdf [file pone.0048047.s006.pdf]

# TABLE S2

|                      | Gene        | Name                     | Sequencing primers (5' - 3') | Reference          | Annealing temperature |
|----------------------|-------------|--------------------------|------------------------------|--------------------|-----------------------|
| <b>MITOCHONDRIAL</b> | <b>CO1</b>  | L2                       | GCAACGATGATTATTTTCCACT       | modified from [15] | 48-50°C               |
|                      |             | H2                       | CCTGGTAAAATTAGAATGTAAACTTCTG |                    |                       |
|                      |             | A+GR                     | CCAGTTTTAGCTGGTGCTATTACIAT   | [16]               | 47°C                  |
|                      |             | B-GR                     | TAATCRGAATATSGTCGGTATTCC     |                    |                       |
|                      | <b>CO2</b>  | co2a                     | GGTCAAACAATTGAGTCTATTTGAAC   | [17]               | 55°C                  |
|                      |             | co2e                     | CCACAAATTTCTGAACATTGACCA     |                    |                       |
|                      |             | RNa                      | TACWMAYCGWTTYCTTYTTGAAGGWC   | modified from [17] | 47°C                  |
|                      |             | RNe                      | CGACCTGGAGTTGCATCAG          |                    |                       |
|                      | <b>Cytb</b> | 427F                     | YTWGTWCAATGARTMTGAGG         | [18]               | 48°C                  |
|                      |             | 800R                     | CCYARTTTATTAGGAATTGATCG      |                    |                       |
|                      | <b>12S</b>  | F                        | TACTATGTTACGACTTAT           | [19]               | 48°C                  |
|                      |             | R                        | AAACTAGGATTAGATACCC          |                    |                       |
| <b>16S</b>           | AG          | CGCCTGTTTATCAAAAACATGT   | [18]                         | 55°C               |                       |
|                      | BG          | AGATCACGTAAGAATTTAATGGTC |                              |                    |                       |
| <b>NUCLEAR</b>       | <b>Hexk</b> | HexF                     | AATGGGGAGCTTTCGGAGAT         | [20]               | 48-50°C               |
|                      |             | HexR                     | CATTGGCACAGTTTTGGTCAG        |                    |                       |
|                      | <b>EF1a</b> | M1F                      | GCWGCGGTACTGGTGAR            | modified from [21] | 54°C                  |
|                      |             | M1R                      | ACACCWGTTCACACWGRCC          |                    |                       |
|                      |             | M51F                     | CTTCAGGATGTRTACAAAATTGGTG    | modified from [22] | 54°C                  |
|                      |             | M53R                     | GCAATATGAGCWGTGTGGCA         |                    |                       |
|                      | <b>H3</b>   | HexAF                    | ATGGCTCGTACCAAGCAGACGGC      | [23]               | 58°C                  |
|                      |             | HexAR                    | ATATCCTTGGGCATGATGGTGAC      |                    |                       |
|                      | <b>28S</b>  | C1'                      | ACCCGCTGAATTTAAGCAT          | [24]               | 55°C                  |
|                      |             | D2b                      | GTTAGACTCCTTGGTCCGT          |                    |                       |
|                      |             | C2'                      | GAAAAGAACTTTGRARAGAGAGT      | [24]               | 54°C                  |
|                      |             | D3                       | ATAGTTCACCATCTTTCGGGTC       | [25]               |                       |
| <b>18S</b>           | A2          | ATGGTTGCAAAGCTGAAAC      | [26]                         | 52°C               |                       |
|                      | 9R          | GATCCTTCCGAGGTTACCTA     | [27]                         |                    |                       |
