# Supplementary material for: Secondary Sympatry Caused by Range Expansion Informs on the Dynamics of Microendemism in a Biodiversity Hotspot
Source: PubMed Central journal article supplement (PMC3490955; doi:10.1371/journal.pone.0048047), 2012-11-06
Supplement: pone.0048047.s007.pdf [file pone.0048047.s007.pdf]

## TABLE S3

| <b>Monophyly constraint</b>  | <b>Mitochondrial total</b> | <b>EF1a</b>  | <b>28S</b>   | <b>Nuclear total</b> |
|------------------------------|----------------------------|--------------|--------------|----------------------|
| <i>A. meridionalis</i>       | 27000 (100)                | 26843 (99.4) | 27000 (100)  | 27000 (100)          |
| <i>A. clarus</i>             | 27000 (100)                | 26264 (97.3) | 26786 (99.2) | 27000 (100)          |
| <i>A. obscurus</i>           | 25882 (95.9)               | 18437 (68.3) | -            | 26879 (99.6)         |
| <i>A. albifrons</i>          | 27000 (100)                | 26445 (97.9) | -            | 27000 (100)          |
| <i>A. tapinopus</i>          | 27000 (100)                | 26988 (99.9) | 27000 (100)  | 27000 (100)          |
| <i>A. azurensis</i>          | <b>0</b> *                 | 25399 (94.1) | 27000 (100)  | 27000 (100)          |
| <i>A. yahoue</i>             | 19670 (72.9)               | 26984 (99.9) | 26821 (99.3) | 27000 (100)          |
| <i>Agnotecous sp.</i>        | 27000 (100)                | 26971 (99.9) | 26999 (99.9) | 27000 (100)          |
| <i>A. sarramea</i>           | 18007 (66.7)               | 26747 (99.1) | 26435 (97.9) | 26975 (99.9)         |
| <i>Number total of trees</i> | 27000                      | 27000        | 27000        | 27000                |
