# Supplementary material for: Secondary Sympatry Caused by Range Expansion Informs on the Dynamics of Microendemism in a Biodiversity Hotspot
Source: PubMed Central journal article supplement (PMC3490955; doi:10.1371/journal.pone.0048047), 2012-11-06
Supplement: pone.0048047.s008.pdf [file pone.0048047.s008.pdf]

TABLE S4

| Species                   | Locality           | Alt.       | GPS details       |                  | Precision             | Ref. |
|---------------------------|--------------------|------------|-------------------|------------------|-----------------------|------|
| <i>A. chopardi</i>        | Rivière Bleue      | 260 m      | 22°05'13,1"S      | 166°38'01,3"E    | Haute Rivière Bleue   | (1)  |
|                           | Pic du Grand Kaori | 260 m      | 22°16'47,1"S      | 166°53'39,9"E    | -                     | (1)  |
| <i>A. doensis</i>         | Mont Do            | 950 m      | 21°45'02''S       | 166°00'09''E     | -                     | (1)  |
| <i>A. sarramea</i>        | Col d'Amieu        | 680 m      | 21°36'14"S        | 165°46'27"E      | Mé Aréto              | (1)  |
|                           |                    | 540 m      | 21°33'52"S        | 165°46'07"E      | Table Unio            | (1)  |
|                           | Dogny              | 930 m      | 21°37'S           | 165°53'E         | -                     | (2)  |
|                           | Farino             | 400 m      | 21°37'S           | 165°46'E         | -                     | (2)  |
| <i>A. tapinopus</i>       | Mont Mou           | 340 m      | 22°04'30"S        | 166°19'52"E      | base                  | (1)  |
|                           | Forêt de Thy       | 120 m      | 22°11'29"S        | 166°32'16,08"E   | -                     | (1)  |
|                           | Mont Koghis        | -          | 22°10'S           | 166°30'E         | Mt Bouo (W slope)     | (3)  |
|                           |                    | 510 m      | 22°10'44,00"S     | 166°30'31,00"E   | -                     | (1)  |
|                           | Yahoue             | -          | 22°12'S           | 166°29'E         | Yahoué village        | (3)  |
| <i>A. humboldti</i>       | Rivière Ngoye      | -          | 21°52'S           | 166°25'E         | Near Mont Humboldt    | (4)  |
| <i>A. nekando</i>         | Mont Nekando       | -          | 21°52'S           | 166°26'E         | -                     | (4)  |
| <i>A. occidentalis</i>    | Col des Roussettes | 400 m      | 21°25'31,8"S      | 165°27'50,3"E    | -                     | (1)  |
|                           | Bourail            | -          | 21°33'S           | 165°29'E         | -                     | (1)  |
| <i>A. novaecaledoniae</i> | Mt Rembai          |            | 21°35'S           | 165°50'E         | -                     | (2)  |
| <i>A. albifrons</i>       | Gelima             | 730 m      | 21°36'S           | 165°58'E         | -                     | (2)  |
|                           | Farino             | 200 m      | 21°39'S           | 165°47'E         | -                     | (2)  |
|                           | Col d'Amieu        | 690 m      | 21°36'14"S        | 165°46'27"E      | Table Unio            | (1)  |
|                           |                    | 550 m      | 21°33'52"S        | 165°46'07"E      | Mé Aréto              | (1)  |
|                           |                    | 460 m      | 21°35'04,3"S      | 165°46'25,5"E    | Col Toma              | (1)  |
| <i>A. meridionalis</i>    | Port Boisé         | 20 m       | 22°20'54,2"S      | 166°58'05,9"E    | -                     | (1)  |
|                           |                    | 5 m        | 22°20'53,1"S      | 166°57'50,5"E    | -                     | (1)  |
|                           | Ile des Pins       | 20 m       | 22°35'21,7"S      | 167°31'19,4"E    | -                     | (1)  |
|                           |                    | 10 m       | 22°39'05,60"S     | 167°26'30,10"E   | Kuto village          | (5)  |
| <i>A. obscurus</i>        | Mont Panié         | 250 m      | 20°33'16"S        | 164°47'36"E      | -                     | (1)  |
|                           | Manjelia           | 700 m      | 20°24'0,70"S      | 164°31'41,00"E   | -                     | (1)  |
|                           | Touho              | 400 m      | 20°47'31,2"S      | 165°13'49,1"E    | -                     | (2)  |
|                           | Pic Amoa           | 500 m      | 20°58'S           | 165°17'E         | -                     | (2)  |
|                           | Houaïlou           | -          | 21°16'S           | 165°14'E         | 40 km from W          | (3)  |
|                           | Poindimié          | -          | 20°53'S           | 165°13'E         | Vallée rivière Tiwaka | (3)  |
|                           | Daewenia           | 620 m      | 164°40'51,23"E    | 20° 32' 15,89" S | -                     | (1)  |
|                           | Wewec              | 380 m      | 164° 43' 50,28" E | 20° 35' 55,44" S | -                     | (1)  |
|                           | Wayen              | 590 m      | 164° 52' 17,26" E | 20° 38' 23,69" S | -                     | (1)  |
| Aoupinié                  | 790 m              | 21°10'52"S | 165°18'06"E       | -                | (1)                   |      |
| <i>A. clarus</i>          | Rivière Bleue      | 210 m      | 22°09'12"S        | 166°40'41,1"E    | Rivière Blanche       | (1)  |
|                           | Pic du Grand Kaori | 260 m      | 22°16'47,1"S      | 166°53'39,9"E    | -                     | (1)  |
|                           | Pic du Pin         | 290 m      | 22°14'52,50"S     | 166°49'42,60"E   | -                     | (1)  |
| <i>A. yahoue</i>          | Mont Mou           | 390 m      | 22°04'30"S        | 166°19'52"E      | -                     | (1)  |
|                           | Monts Dzumac       | 880 m      | 22°1'45,7"S       | 166°28'13,2"E    | -                     | (1)  |
|                           | Mont Humboldt      | 1010 m     | 21°52'48,6"S      | 166°25'14"E      | -                     | (1)  |
|                           | Monts Koghis       | 510 m      | 22°10'44,00"S     | 166°30'31,00"E   | -                     | (1)  |
|                           |                    | -          | 22°10'12,89"S     | 166°30'40,42"E   | Mt Bouo (W slope)     | (3)  |
|                           | Yahoue             | -          | 22°12'32,89"S     | 166°29'16,74"E   | Yahoué village        | (3)  |

|                        |                   |        |               |                |                        |     |
|------------------------|-------------------|--------|---------------|----------------|------------------------|-----|
| <i>A. azurensis</i>    | Rivière Bleue     | 175 m  | 22°07'11,3"S  | 166°39'34,1"E  | Pont du mois de mai    | (1) |
|                        |                   | 50 m   | 22°06'S       | 166°39'E       | Kaori Géant            | (2) |
|                        |                   | 180 m  | 22°7'40.86"S  | 166°39'49.26"E | -                      | (1) |
|                        |                   | 180 m  | 22°05'57,5"S  | 166°39'45,2"E  | Gué de la Pourina      | (1) |
|                        |                   | 210 m  | 22°09'12"S    | 166°40'41,1"E  | Rivière Blanche        | (1) |
|                        | Forêt Nord        | 480 m  | 22°19'S       | 166°55'E       | -                      | (2) |
|                        | Grand Kaori       | 260 m  | 22°16'47,1"S  | 166°53'39,9"E  | -                      | (1) |
|                        | Port Boisé        | -      | 22°20'54,2"S  | 166°58'05,9"E  | -                      | (6) |
|                        | Pic du Pin        | 290 m  | 22°14'52.50"S | 166°49'42.60"E | -                      | (1) |
| <i>A. brachypterus</i> | Sarraméa          | 180 m  | 21°38'27,01"S | 165°50'40,78"E | Village                | (6) |
|                        | Pocquereux        | 30 m   | 21° 44'03"S   | 165° 53'51"E   | -                      | (1) |
| <i>A. minoris</i>      | Mont Mou          | 390 m  | 22°04'30"S    | 165°19'52"E    | Base                   | (4) |
| <i>A. petchekara</i>   | Col de Petchekara | 320 m  | 21°34'S       | 166°07'E       | -                      | (4) |
| <i>A. pinsula</i>      | Ile des Pins      | 20 m   | 22°35'21.7"S  | 167°31'19.4"E  | -                      | (1) |
| <i>A. robustus</i>     | Aoupinié          | 790 m  | 21°10'52"S    | 165°18'06"E    | -                      | (1) |
|                        | Poindimié         | -      | 20°51'S       | 165°15'E       | Vallée Amoa            | (6) |
|                        | Poya              | -      | 21°13'S       | 165°16'E       | South of Mont Aoupinié | (6) |
|                        | Mont Panié        | -      | 20°33'S       | 164°47'E       |                        | (3) |
| <i>Agnotecous sp.</i>  | Mont Mou          | 1140 m | 22°3'42.4"S   | 166°20'50.3"E  | Sommet                 | (1) |
|                        |                   | 1015 m | 22°3'57.1" S  | 166°20'35.5"E  | Maquis                 | (1) |
