# Supplementary material for: Secondary Sympatry Caused by Range Expansion Informs on the Dynamics of Microendemism in a Biodiversity Hotspot
Source: PubMed Central journal article supplement (PMC3490955; doi:10.1371/journal.pone.0048047), 2012-11-06
Supplement: pone.0048047.s009.pdf [file pone.0048047.s009.pdf]

**TABLE S5**

| statistic | $M_R$    | $I_C$ | $M_{II}^*$ | $M_{II}$ | $M_{\Sigma}^*$ | $M_{\Sigma}$ | $B_1$   |
|-----------|----------|-------|------------|----------|----------------|--------------|---------|
| Min ERM   | 1.30E-08 | 105   | -1.4       | 1.30E-08 | 0.3            | 5.64         | 3.25    |
| Max ERM   | 1        | 0     | 0          | 1        | 1              | 15           | 10.6667 |
| Observed  | 0.49     | 53    | -0.82      | 0.00021  | 0.56           | 10.34        | 6.83    |
| P-value   |          | 0.016 | 0.0097     | 0.0066   | 0.011          | 0.0093       | 0.022   |
