# Supplementary material for: Secondary Sympatry Caused by Range Expansion Informs on the Dynamics of Microendemism in a Biodiversity Hotspot
Source: PubMed Central journal article supplement (PMC3490955; doi:10.1371/journal.pone.0048047), 2012-11-06
Supplement: pone.0048047.s010.pdf [file pone.0048047.s010.pdf]

**TABLE S6**

---

| <b>Node</b>    | <b>15</b> | <b>14</b> | <b>13</b> | <b>12</b> | <b>11</b> | <b>10</b> | <b>9</b> | <b>8</b> | <b>7</b> | <b>6</b> | <b>5</b> | <b>4</b> | <b>3</b> | <b>2</b> |
|----------------|-----------|-----------|-----------|-----------|-----------|-----------|----------|----------|----------|----------|----------|----------|----------|----------|
| <b>P-value</b> | 0.4991    | 0.4997    | 0.3801    | 0.6675    | 0.4261    | 0.6654    | 0.5003   | 0.2121   | 0.1076   | 0.4996   | 0.4862   | 0.4746   | 0.5289   | 0.293    |
| <b>Delta 1</b> | 0.3038    | 0.3038    | 0.5188    | 0.4742    | -0.0687   | 0.4742    | 0.2882   | -0.357   | 1.0562   | 0.124    | 0.1118   | 0.1016   | 0.0929   | -1.0693  |
