# Supplementary material for: Secondary Sympatry Caused by Range Expansion Informs on the Dynamics of Microendemism in a Biodiversity Hotspot
Source: PubMed Central journal article supplement (PMC3490955; doi:10.1371/journal.pone.0048047), 2012-11-06
Supplement: pone.0048047.s011.pdf [file pone.0048047.s011.pdf]

**TABLE S7**

|               | Model       | Number of parameters | Lh    | AIC   | AICc  | $\Delta$ AICc |
|---------------|-------------|----------------------|-------|-------|-------|---------------|
| Constant rate | Pure Birth  | 1                    | -5.44 | 12.87 | 13.16 | 3.19          |
|               | Birth Death | 2                    | -5.44 | 14.87 | 15.79 | 5.82          |
| Variable rate | y-2-rate    | 2                    | -4.52 | 15.05 | 15.97 | 6             |
