# Supplementary material for: Secondary Sympatry Caused by Range Expansion Informs on the Dynamics of Microendemism in a Biodiversity Hotspot
Source: PubMed Central journal article supplement (PMC3490955; doi:10.1371/journal.pone.0048047), 2012-11-06
Supplement: pone.0048047.s013.pdf [file pone.0048047.s013.pdf]

**Text S2.** *Characteristics of mitochondrial (a) and nuclear (b) datasets used in this study*

(a)

| <b>MITOCHONDRIAL</b> |                |                                 |                                                        |                 |
|----------------------|----------------|---------------------------------|--------------------------------------------------------|-----------------|
| Studied gene         | Number of taxa | Sequence length (in base pairs) | Number of informative sites within the intra group (%) | Evolution model |
| 16S                  | 36             | 522                             | 128 (24.5 %)                                           | -               |
| 12S                  | 32             | 408                             | 43 (10.5 %)                                            | -               |
| Cytb                 | 36             | 346                             | 92 (26.6 %)                                            | -               |
| CO1                  | 36             | 1272                            | 224 (17.6 %)                                           | -               |
| CO2                  | 26             | 400                             | 54 (13.5 %)                                            | -               |
| Total                | 37             | 2948                            | 541 (18.4 %)                                           | GTR+G           |

(b)

| <b>NUCLEAR</b> |                |                                 |                                                        |                 |
|----------------|----------------|---------------------------------|--------------------------------------------------------|-----------------|
| Studied gene   | Number of taxa | Sequence length (in base pairs) | Number of informative sites within the intra group (%) | Evolution model |
| EF1- $\alpha$  | 37             | 990                             | 67 (6.8 %)                                             | GTR+I+G         |
| 28S            | 28             | 1466                            | 148 (10.1 %)                                           | GTR+I+G         |
| HexK           | 16             | 464                             | 11 (2.4 %)                                             | -               |
| H3             | 33             | 329                             | 10 (3 %)                                               | -               |
| 18S            | 31             | 652                             | 5 (0.8 %)                                              | -               |
| Total          | 37             | 3901                            | 241 (6.2 %)                                            | GTR+I+G         |
